# Supplementary material for: Effects of weather and climate on fluctuations of grain prices in southwestern Bohemia, 1725–1824 CE
Source: Copernicus journal article supplement (doi:10.5194/cp-2024-2), 2024-01-11
Supplement: Supplementary file [file cp-2024-2-AC5-supplement.pdf]

It is very difficult to add comments to this paper after the previous reviewers!

This is a very interesting paper and should be published.

I have some very minor additions, which I don't think the other reviewers have bothered with, but since I have to write something, here are some very minor ideas and suggestions.

Personally, I found table 2 and the examination of years with extremely high grain prices very interesting.

**RESPONSE:** We would like to thank the anonymous referee #4 for evaluation of our paper and raising several critical comments, which we are trying to answer below.

Some very minor language issues:

317: "... snow which was lying for four weeks that all grain already sown extinct..." something like? "...snow which was lying for four weeks and destroyed all grain already sown..."

**RESPONSE:** Accepted and changed as proposed.

318 "...i.e. sooner too wet and then too dry..." something like: "...i.e. first too wet and then too dry..."

**RESPONSE:** Accepted and changed as proposed.

References to the appendix (line 267 and particularly line 382) are not very clear. ("Table A1"). Eventually you come to these tables, but it would be easier if just "see appendix, table A1" - or even better, adopt Ljungqvist approach and place the Appendix in the text.

**RESPONSE:** Accepted. Tables from the Appendix were included in the text.

432 "raising grain prices to six guldens." This is an informative quote, but would be even more informative, if there was an addition to the "normal" price - or what price it was raised from.

**RESPONSE:** To present "normal" price is very difficult due to missing comparable values, because "raising grain price to six guldens" cites an author of the Klatovy chronicle. We may only mention situation from surrounding towns. The most extended bread grain (rye) at Sušice increased in the first half of 1741 from 1.5 to 2 guldens. For 1742 rye prices are not available and before the harvest in 1743 it was 4.5 guldens. Prices in Klatovy could have been similar to the regional market in Písek, where rye prices increased from c. 4 guldens in January 1742 to 5.5 guldens before the harvest, while before the harvest in 1743 it was slightly less than 5 guldens. I.e., it would be speculative to add into chronicle citation any such value.

511. "... focusing on ten selected years /-/ only the years 1771-1772, 1802, and 1918-1817 were outside of war..." 5 out of 10 is not what I should describe as "only". Make it easy: delete "only".

**RESPONSE:** Accepted, "only" was deleted.
